# Supplementary material
Source: Springer Nature journal article supplement (https://www.springermedizin.de/resource/supplementary/12935_2001_1_MOESM1_ESM.pdf/9540084)

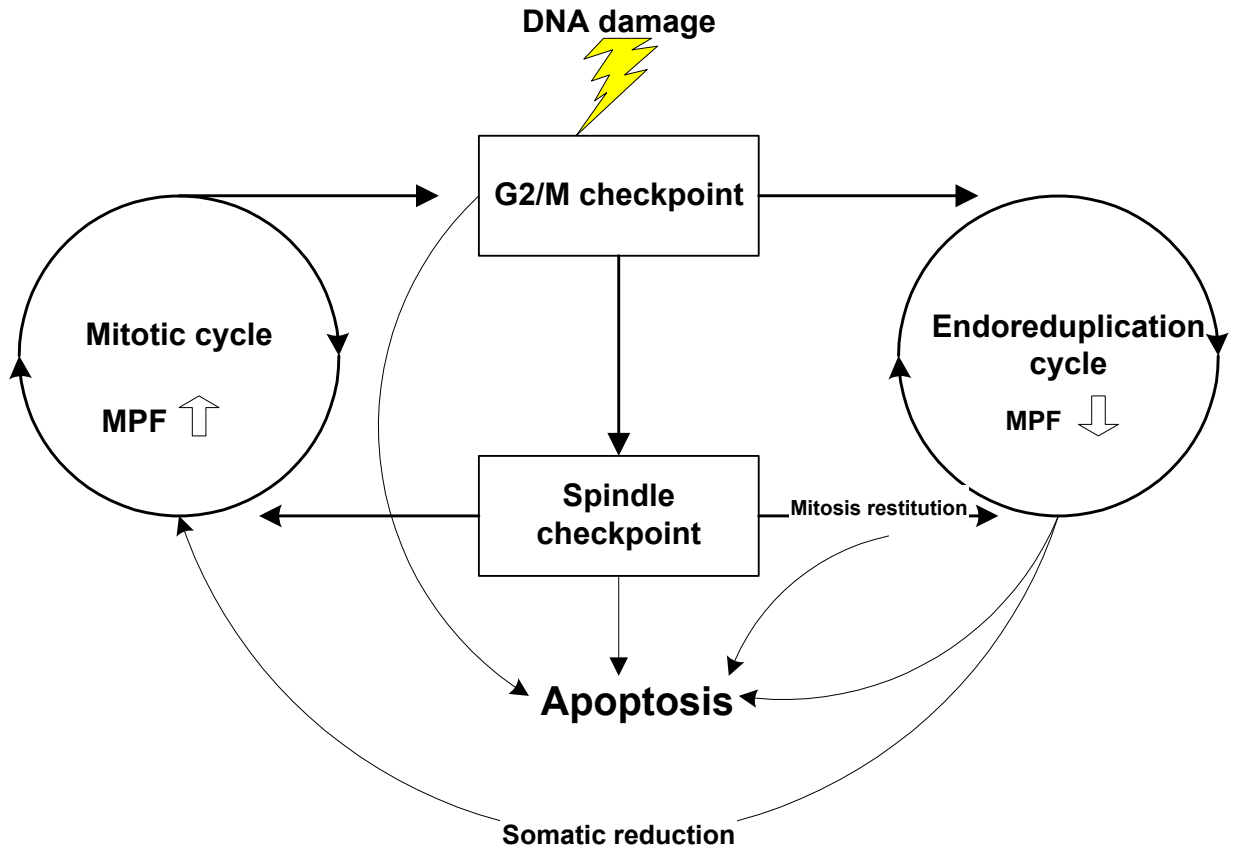

Supplement: MOESM1 [file 9540084]
